# Supplementary material for: The Protective Effect of Radix Polygoni Multiflori on Diabetic Encephalopathy via Regulating Myosin Light Chain Kinase Expression
Source: Hindawi journal article supplement (doi:10.1155/2015/484721), 2015-01-01
Supplement: f1 [file 484721.f1.pdf]

Supplementary Figure legends

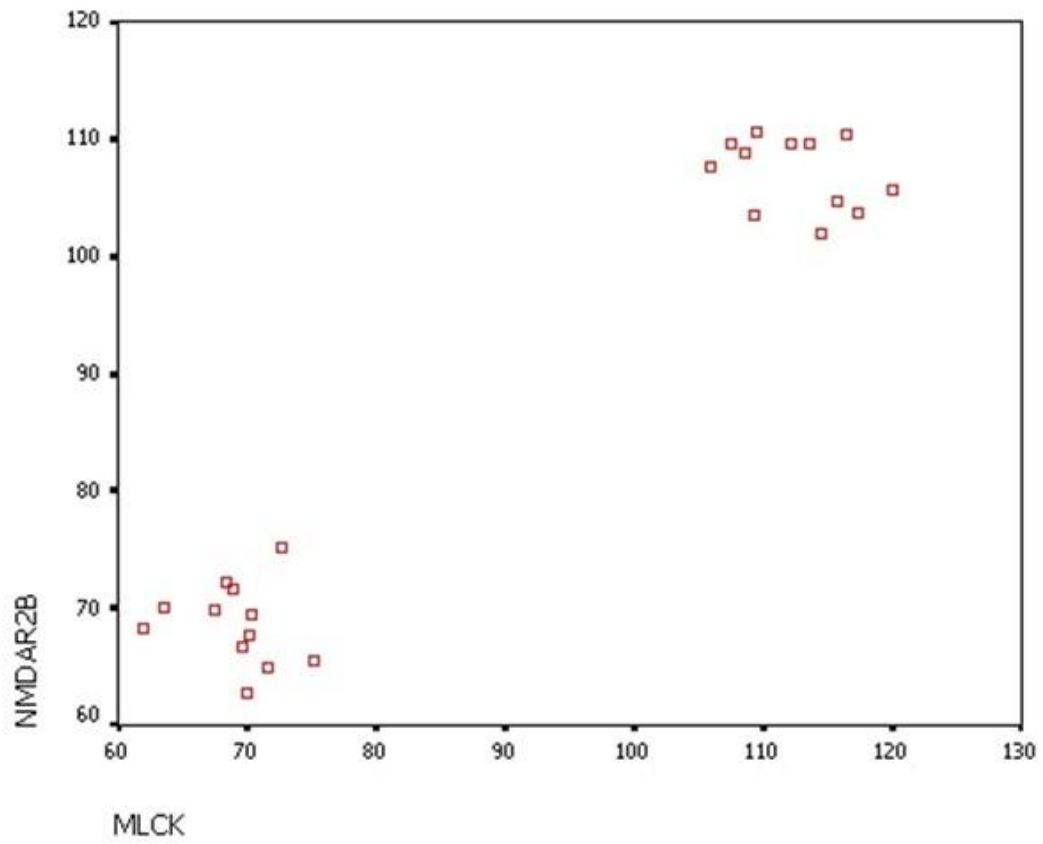

Supplementary FIGURE.1 The Correlation analysis of MLCK and NMDAR2B expression ( $r=0.958$ ,  $P < 0.01$ )

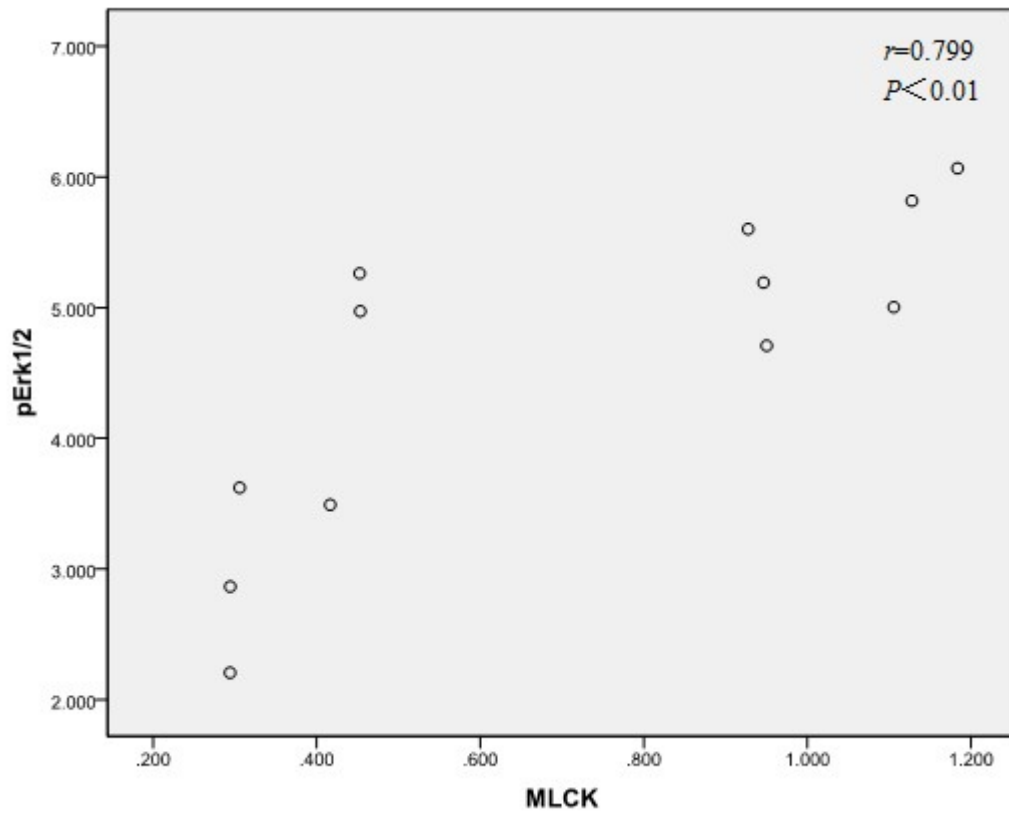

Supplementary FIGURE. 2 The Correlation analysis of MLCK and phosphorylated ERK expression

( $r=0.799, P<0.01$ )

Supplementary TABLE1 Optical density values of MLCK and NMDAR2B in hippocampal tissue in rats by immunofluorescence staining

|                                  | Group A (n=20) | Group B (n=31) |
|----------------------------------|----------------|----------------|
| MLCK                             | 69.31±9.36     | 112.31±8.73*   |
| NMDAR2B                          | 68.92±8.33     | 106.91±8.44*   |
| Co-expression of MLCK andNMDAR2B | 61.33±8.55     | 101.82±7.68*   |

\* P<0.05, compared to group A

Supplementary Table2 The results of morris water maze test

|                        | Group A<br>(n=12) | Group B<br>(n=12)        | Group C<br>(n=12) | Group D<br>(n=12) |
|------------------------|-------------------|--------------------------|-------------------|-------------------|
| escape latency (s)     | 12.97±7.98        | 30.40±12.68 <sup>△</sup> | 14.73±7.49**      | 18.23±6.56*       |
| first-passsge time (s) | 8.43±7.35         | 32.77±19.66 <sup>△</sup> | 10.58±6.53**      | 16.29±8.74*       |
| The times of cross     | 3.62±2.31         | 1.44±1.34 <sup>△</sup>   | 3.60±2.12**       | 2.25±1.59*        |

△compared with group A,  $P<0.01$ ; \* compared with group B,  $P<0.05$ , \*\* compared with group B,

$P<0.01$
